# Supplementary material for: One-step synthesis of recycled 3D CeVO4/rGO composite aerogels for efficient degradation of organic dyes
Source: Royal Society of Chemistry journal article supplement (doi:10.1039/c6ra18013b), 2016-01-01
Supplement: c6ra18013b1.pdf [file c6ra18013b1.pdf]

## Supporting information

### **One-step synthesis of recycled 3D CeVO<sub>4</sub>/rGO composite aerogels for efficient degradation of organic dyes**

Q. Q. Liu\*, C. Y. Fan, H. Tang, T. D. Ma and J. Y. Shen

FigureS1 Adsorption properties of MB for CeVO<sub>4</sub>/rGO composite aerogels prepared with different (a) GO concentration, (b) reaction time and (c) reaction temperature

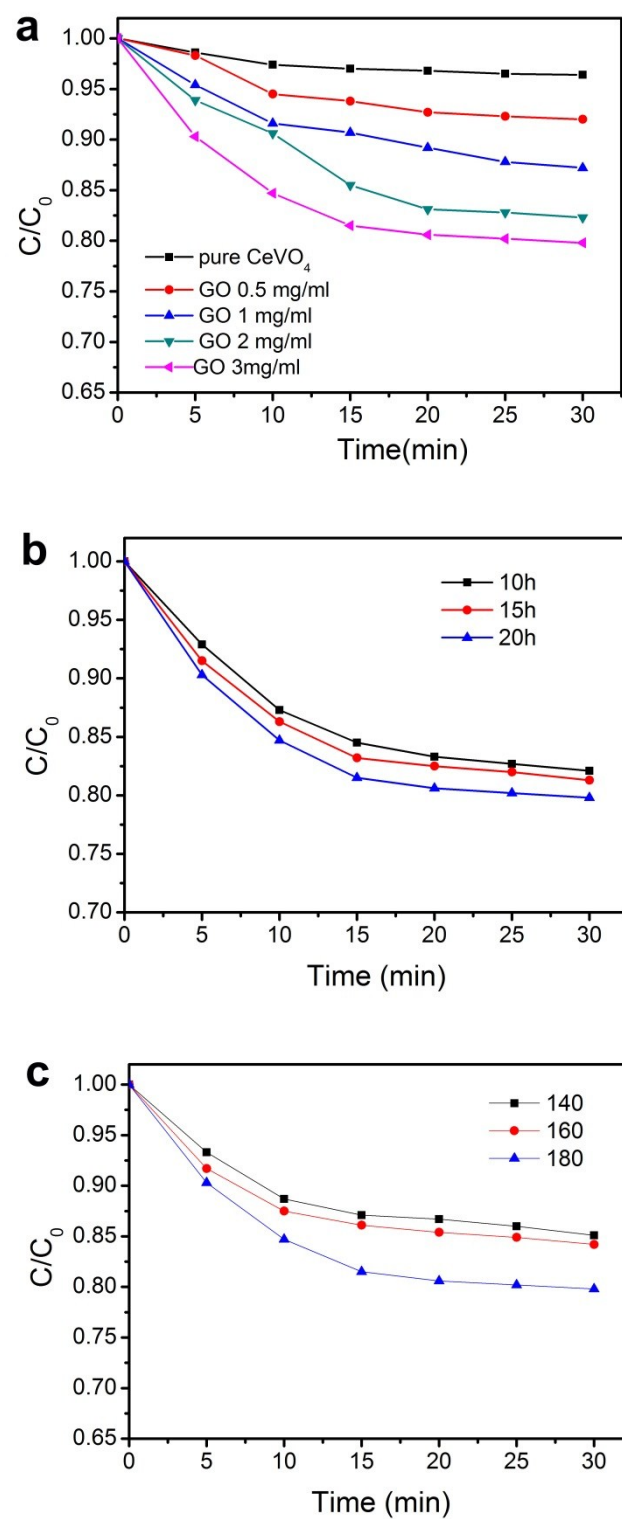

FigureS1 Adsorption properties of MB for  $CeVO_4/rGO$  composite aerogels prepared with different (a) GO concentration, (b) reaction time and (c) reaction temperature
